# Supplementary material
Source: Copernicus journal article supplement (doi:10.5194/egusphere-2026-978)
Supplement: Supplementary file [file egusphere-2026-978-AC2-supplement.pdf]

1 **Response to the reviews of “Current status of ocean observation, ensemble reanalysis and**  
2 **CMIP6 models in describing Antarctic Bottom Water” by S. Chen, Liu, J., and X. Han**

3  
4 Response to comments by Reviewer #2

5  
6 We would like to thank the reviewer for the helpful comments on the paper.

7  
8 *Major Comments*

9 *1. Novelty and physical basis of the classification.*

10 *The manuscript presents the classification as a “new framework”. However, the idea that AABW*  
11 *can be separated into regional source types (Weddell, Ross, Adélie/Prydz) based on thermohaline*  
12 *properties is already well established in the literature (e.g. Talley, Pardo et al., and many other*  
13 *studies). The present approach appears to formalise this using fixed salinity ranges and*  
14 *geographic masks, but it is not clear that this constitutes a genuinely new framework.*

15 *More importantly, the classification is defined using very narrow salinity ranges applied far*  
16 *downstream of formation regions. It is unclear whether such narrow thresholds can robustly*  
17 *distinguish source contributions in the interior ocean. The decision not to include conservative*  
18 *temperature also weakens the constraints. This raises the question of whether the method is*  
19 *identifying dynamically meaningful water masses, or simply segmenting the field based on*  
20 *arbitrary thresholds. As the previous reviewer noted, sensitivity analysis would help here.*

21  
22 **Response:**

23 **Thanks for the reviewer’s constructive comments. We agree that it is important to show our water**  
24 **mass classification is dynamically meaningful. In the revised manuscript, we have conducted a**  
25 **sensitivity analysis to demonstrate the physical robustness of the Antarctic Bottom Water (AABW)**  
26 **subtype classification, and thoroughly revised the text to contextualize our method within existing**  
27 **classical literature.**

28  
29 **We agree that the existence of multiple origins for AABW is established in classical oceanography,**  
30 **primarily built upon pioneering observational studies (e.g., Talley, 2013; Pardo et al., 2012). In**  
31 **this revision, we removed the potentially ambiguous term 'new framework' and explicitly cited**  
32 **classical literature. The core of our work is to systematically evaluate whether the ensemble**  
33 **reanalysis and CMIP6 climate models can simulate AABW subtypes that are characterized by**  
34 **different thermohaline properties and spatial distributions.**

35  
36 **First, we only used the neutral density ( $\gamma_n \geq 28.27 \text{ kg m}^{-3}$ ) as the threshold to serve as a physical**  
37 **reference for the AABW. Figure R1 outlines the area covered by the AABW. It is mainly**  
38 **distributed from the eastern Ross Sea to the Bellingshausen Sea, from the central Weddell Sea to**  
39 **the Indian Ocean sector, and north of the East Antarctic continental margin from 75°E to 150°E.**

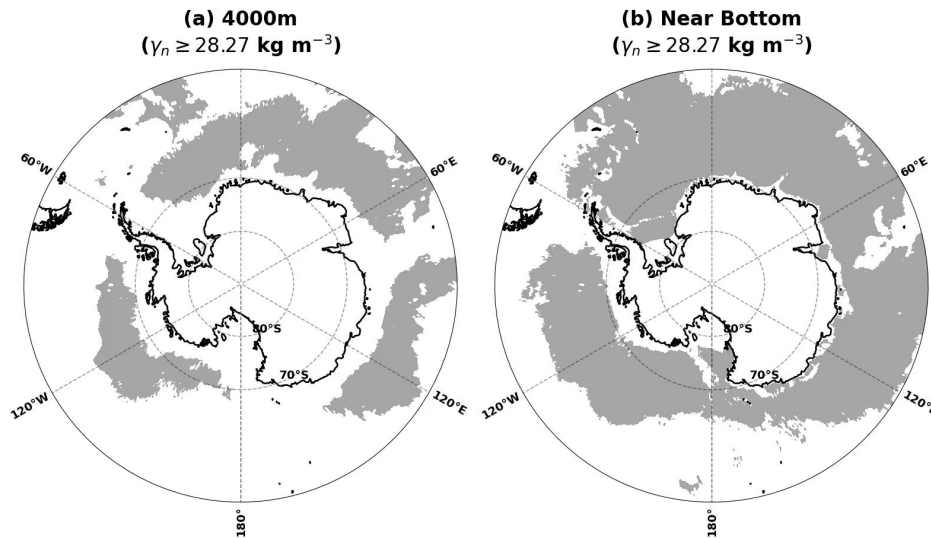

40  
 41 Figure R1. Spatial footprint of Antarctic Bottom Water (AABW) defined solely by the classical  
 42 neutral density threshold ( $\gamma_n \geq 28.27 \text{ kg m}^{-3}$ ) across the Southern Ocean. The gray shaded regions  
 43 illustrate the geographical extent of water masses satisfying this density criterion at (a) the 4000  
 44 m depth layer and (b) the near-bottom layer. The diagnostic results are derived from the World  
 45 Ocean Atlas 2023 (WOA23) climatology.

46  
 47 Second, in cold polar waters, the thermal expansion coefficient of seawater plays a relatively minor  
 48 role, making salinity the primary driver of density variation. Therefore, we adopted the central  
 49 salinity values of the respective water masses, including the Weddell-Prydz Bottom Water  
 50 (WPBW), the Ross Sea Bottom Water (RSBW), and Adélie Land Bottom Water (ALBW), as  
 51 defined by Pardo et al. (2012). Here, we also conducted a sensitivity analysis of the classification  
 52 to different salinity ranges relative to these central values. In our previous manuscript, we used a  
 53 salinity range of  $\Delta S = \pm 0.01$  psu relative to each central salinity value, corresponding to twice the  
 54 uncertainty reported by Pardo et al. (2012). We subsequently tested a series of widened thresholds,  
 55 including  $\Delta S = \pm 0.02, \pm 0.03,$  and  $\pm 0.04$  psu.

56  
 57 Figure R2 shows the spatial distributions of the three AABW subtypes evaluated under these  
 58 progressively widened salinity thresholds at both the 4000 m and near-bottom layers. At the 4000  
 59 m depth layer, the three AABW subtypes within their respective prescribed longitudinal sectors  
 60 exhibit quite stable and similar spatial distributions when  $\Delta S \geq 0.02$  psu. This feature also holds  
 61 true for the near-bottom layer. Table R1 provides spatial area ( $10^6 \text{ km}^2$ ) of each AABW subtype  
 62 calculated under different salinity thresholds. It demonstrates that the areas of the three AABW  
 63 subtypes tend to slowly converge to the values based solely on the neutral density criterion as  $\Delta S$   
 64 reaches or exceeds  $\pm 0.02$  psu (Table R1).

65  
 66 Given that a salinity threshold greater than  $\pm 0.02$  psu may overly incorporate diluted peripheral  
 67 waters and the overlying Circumpolar Deep Water (CDW), we selected  $\pm 0.02$  psu as the revised  
 68 threshold. This provides a reasonable balance, facilitating the identification of the main bottom  
 69 water bodies while mitigating the potential over-inclusion of overlying CDW. Ultimately, this  
 70 framework robustly delineates the bottom water distributions with distinct source-region  
 71 characteristics and main advection pathways.

72

73 Third, in the first step of identifying water masses, we used the neutral density threshold ( $\gamma_n \geq$   
 74  $28.27 \text{ kg m}^{-3}$ ), in which the temperature effect is also included as a thermodynamic factor for  
 75 calculating density. We removed the phrase 'excluding temperature' in the revised manuscript. In  
 76 our response to the reviewer's major comment #3, we conducted a sensitivity analysis of the  
 77 classification to different temperature ranges relative to these central values (see detailed  
 78 discussion there).

79  
 80  
 81  
 82

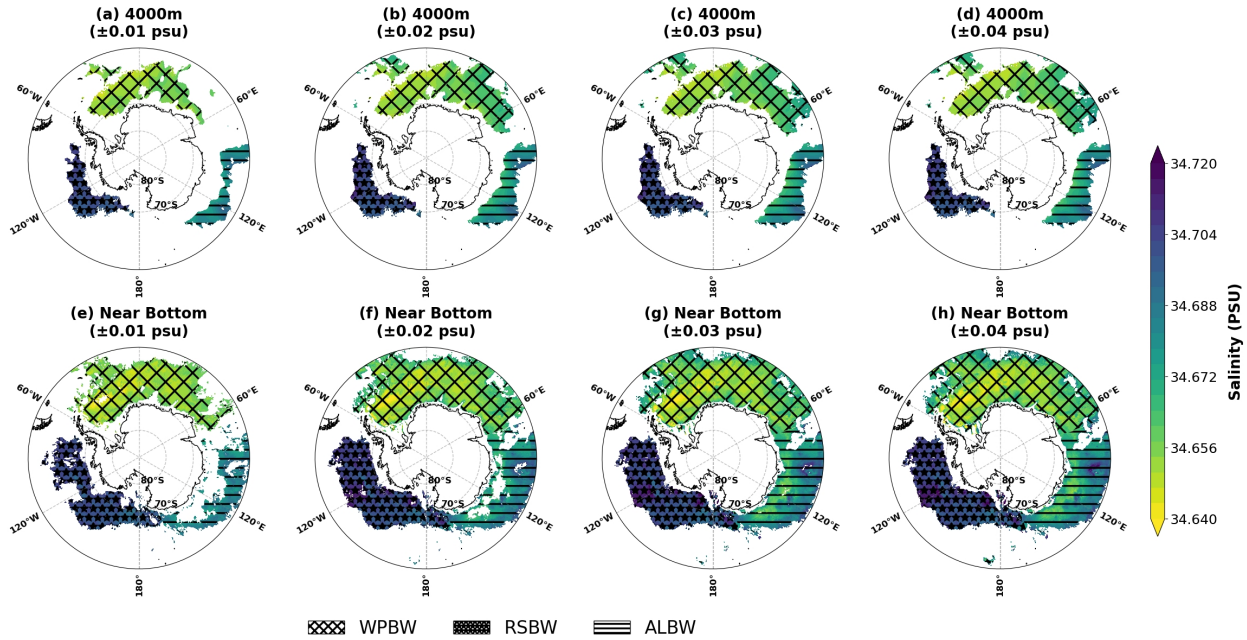

83  
 84 Figure R2. Spatial distributions of the identified Antarctic Bottom Water (AABW) subtypes under  
 85 different salinity thresholds ( $\Delta S$ ). The top row (a–d) and bottom row (e–h) represent the 4000 m  
 86 depth layer and the near-bottom layer, respectively. Columns from left to right show classifications  
 87 based on applied  $\Delta S$  values of  $\pm 0.01$ ,  $\pm 0.02$ ,  $\pm 0.03$ , and  $\pm 0.04$  around the central salinity values  
 88 (WPBW: 34.650; RSBW: 34.695; ALBW: 34.683). Note that they are also constrained by the  
 89 neutral density threshold ( $\gamma_n \geq 28.27 \text{ kg m}^{-3}$ ). The respective AABW subtypes are distinguished  
 90 by distinct hatching patterns, as detailed in the figure legend. The background color shading  
 91 represents the practical salinity field.

92  
 93  
 94  
 95  
 96  
 97

Table R1. Calculated areas ( $10^6 \text{ km}^2$ ) of the three AABW subtypes under different salinity  
 thresholds ( $\Delta S$ ) at the 4000 m layer and the near-bottom layer. These thresholds are defined around  
 the central salinity values (WPBW: 34.650; RSBW: 34.695; ALBW: 34.683).

| Layer  | Subtype | Neutral Density Only | $\pm 0.010$ | $\pm 0.020$ | $\pm 0.030$ | $\pm 0.040$ |
|--------|---------|----------------------|-------------|-------------|-------------|-------------|
| 4000 m | WPBW    | 8.36                 | 4.96        | 7.56        | 8.30        | 8.36        |

|             |      |       |      |       |       |       |
|-------------|------|-------|------|-------|-------|-------|
|             | RSBW | 2.92  | 2.53 | 2.92  | 2.92  | 2.92  |
|             | ALBW | 3.25  | 2.03 | 3.10  | 3.25  | 3.25  |
| Near-Bottom | WPBW | 13.96 | 9.05 | 12.19 | 13.28 | 13.60 |
|             | RSBW | 7.71  | 5.73 | 7.27  | 7.45  | 7.50  |
|             | ALBW | 6.88  | 3.50 | 5.59  | 6.62  | 6.70  |

98

99

100

101

102

103

104 *2. Use of endmember properties without a mixing framework (OMP issue). This is probably my*  
 105 *biggest concern. The salinity ranges are taken from Pardo et al. (2012), who use Optimum*  
 106 *Multiparameter (OMP) analysis. Therefore the quoted values represent end members, rather than*  
 107 *mean properties. OMP explicitly accounts for mixing and derives bulk water mass fractions based*  
 108 *on unmixed source waters. In the present manuscript, these endmember values are used directly*  
 109 *as classification thresholds without performing any mixing analysis. It is unclear to me whether*  
 110 *this is appropriate.*

111

112 **Response:**

113 Thank you for raising this important point. We agree that the hydrographic values reported by  
 114 Pardo et al. (2012) represent source-water endmembers derived within an Optimum  
 115 Multiparameter (OMP) framework, rather than the mean properties of mixed AABW in the ocean  
 116 interior. We therefore clarified this distinction in the revised manuscript.

117

118 In our study, these endmember salinity values are not used to calculate water-mass fractions or to  
 119 attribute individual water parcels quantitatively to a unique formation source. Instead, the reported  
 120 endmember salinities are used only as central reference values for defining hydrographic subtypes  
 121 associated with the Weddell–Prydz, Ross Sea, and Adélie Land source regions. The classification  
 122 is additionally constrained by the neutral-density threshold  $\gamma_n \geq 28.27 \text{ kg m}^{-3}$  and by prescribed  
 123 geographical sectors. We revised the terminology accordingly and no longer imply that the method  
 124 provides an OMP-type decomposition of source-water contributions.

125

126 The sensitivity analysis described in our response to major comment #1 evaluates the dependence  
 127 of the classification on the adopted endmember values. Rather than requiring grid cells to match  
 128 an exact endmember salinity, we tested progressively wider ranges of  $\Delta S = \pm 0.01, \pm 0.02, \pm 0.03,$   
 129  $\text{and } \pm 0.04$  around each reference value. As shown in Figure R2 and Table R1, the three AABW  
 130 subtypes within their respective prescribed longitudinal sectors exhibit quite stable and similar  
 131 spatial distributions when  $\Delta S \geq 0.02 \text{ psu}$  (Figure R2). The areas of the three AABW subtypes tend  
 132 to slowly converge to the values based solely on the neutral density criterion as  $\Delta S$  reaches or  
 133 exceeds  $\pm 0.02 \text{ psu}$  (Table R1). No abrupt spatial reorganization occurs when the threshold is  
 134 widened, indicating that the classification is not controlled by an isolated or arbitrarily precise  
 135 endmember value.

136  
137  
138  
139  
140  
141  
142  
143  
144  
145  
146  
147  
148  
149  
150  
151  
152  
153  
154  
155  
156  
157  
158  
159  
160  
161  
162  
163  
164  
165  
166  
167  
168  
169  
170  
171  
172  
173  
174  
175  
176  
177  
178  
179  
180  
181

On the basis of this analysis, we adopted  $\Delta S = \pm 0.02$  in the revised manuscript. This range allows for moderate modification of the source-water properties through mixing and downstream spreading. We therefore interpret the resulting categories as hydrographic AABW subtypes with properties characteristic of the respective source regions, rather than as unmixed endmembers or quantitative source fractions. We have added this methodological qualification and its associated limitation in the revised manuscript.

*3. Exclusion of temperature. The manuscript explicitly excludes potential temperature from the classification on the basis that it is “too variable”. This is difficult to justify physically, particularly as the manuscript also uses density (and therefore implicitly temperature). Also - excluding temperature while later discussing temperature patterns extensively leads to an inconsistency between the definition and the interpretation.*

Response:

Thank you for the reviewer’s comment. We agree that our previous statement that potential temperature was “excluded” because it was “too variable” was insufficiently precise. In fact, temperature is incorporated into the calculation of the neutral density threshold ( $\gamma_n \geq 28.27 \text{ kg m}^{-3}$ ), which is used in the first step to identify Antarctic Bottom Water (AABW). We have therefore removed the phrase “excluding temperature” from the revised manuscript.

To assess whether potential temperature can provide an additional independent constraint for distinguishing the three AABW subtypes, we conducted a sensitivity analysis using progressively widened potential-temperature ranges relative to the central value reported by Pardo et al. (2012), including  $\Delta T = \pm 0.10, \pm 0.20, \pm 0.30, \pm 0.40,$  and  $\pm 0.50 \text{ }^\circ\text{C}$  (Figure R3 and Table R2). Under a narrow range (i.e.,  $\pm 0.10 \text{ }^\circ\text{C}$ ), the identified water-mass areas are small and spatially fragmented. At 4000 m, a range of  $\pm 0.10 \text{ }^\circ\text{C}$  identifies WPBW, RSBW, and ALBW areas of 0.46, 0.85, and  $1.66 \times 10^6 \text{ km}^2$ , respectively, whereas a range of  $\pm 0.30 \text{ }^\circ\text{C}$  identifies much larger areas, 4.92, 4.17, and  $4.67 \times 10^6 \text{ km}^2$ . The identified distributions continue to expand and change in spatial continuity under wider ranges, with similar behavior at the near-bottom layer.

Although increasing the identified area is an expected consequence of widening the classification range, the potential-temperature analysis does not exhibit a clear stage at which the principal spatial patterns become relatively stable. By contrast, once the salinity range reaches  $\Delta S = \pm 0.02$ , the principal distributions of the three AABW subtypes remain broadly consistent, and further widening mainly produces a gradual expansion of their boundaries. A fixed potential-temperature range therefore provides a less stable standalone constraint for subtype classification.

Accordingly, we use neutral density (temperature effect partially considered), salinity characteristics, and geographical sectors to define the subtype distributions. Potential temperature is subsequently evaluated within these identified spatial footprints to diagnose thermodynamic biases in the Ensemble Reanalysis and CMIP6 models. We have clarified this distinction between water-mass classification and thermodynamic-property evaluation in the revised manuscript.

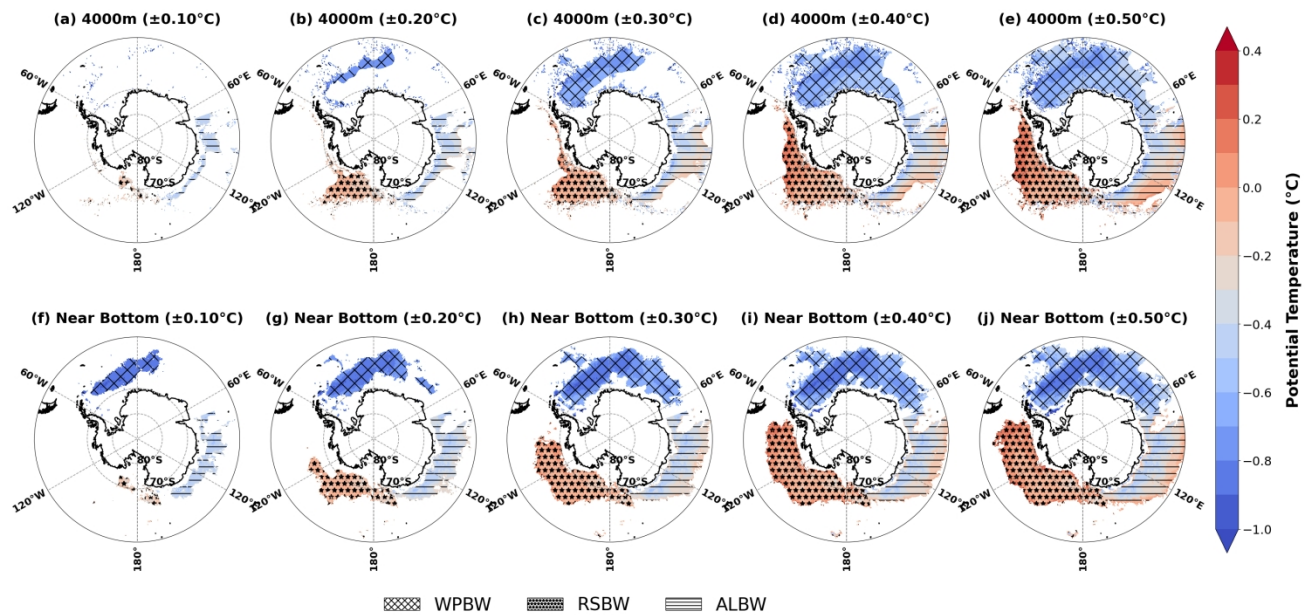

182  
 183 Figure R3. Sensitivity of the spatial distribution of Antarctic Bottom Water (AABW) subtypes to  
 184 progressively widened potential temperature (PT) classification thresholds. The 10-panel layout  
 185 illustrates the diagnostic results at the 4000 m depth layer (upper row, panels a–e) and the  
 186 near-bottom layer (lower row, panels f–j) based on the World Ocean Atlas 2023 (WOA23) climatology.  
 187 The classification bounds are symmetrically relaxed with specific values of  $\pm 0.10$ ,  $\pm 0.20$ ,  $\pm 0.30$ ,  
 188  $\pm 0.40$ , and  $\pm 0.50$  °C. The background color shading represents the background potential  
 189 temperature field (°C). The respective AABW subtypes are distinguished by distinct hatching  
 190 patterns, as detailed in the figure legend.

191  
 192  
 193 Table R2. Quantitative sensitivity of the identified areal extent ( $10^6$  km<sup>2</sup>) of AABW subtypes  
 194 (WPBW, RSBW, and ALBW) to varying potential temperature (PT, °C) thresholds. The analysis  
 195 is evaluated at both the 4000 m layer and the near-bottom layer based on the World Ocean Atlas  
 196 2023 (WOA23) climatology.

| Layer       | Subtype | $\pm 0.10$ °C | $\pm 0.20$ °C | $\pm 0.30$ °C | $\pm 0.40$ °C | $\pm 0.50$ °C |
|-------------|---------|---------------|---------------|---------------|---------------|---------------|
| 4000 m      | WPBW    | 0.46          | 2.07          | 4.92          | 8.21          | 10.52         |
|             | RSBW    | 0.85          | 2.81          | 4.17          | 5.80          | 6.61          |
|             | ALBW    | 1.66          | 3.16          | 4.67          | 5.74          | 6.72          |
| Near-Bottom | WPBW    | 2.19          | 4.05          | 6.93          | 8.90          | 10.47         |
|             | RSBW    | 0.63          | 3.08          | 5.34          | 6.92          | 7.42          |
|             | ALBW    | 2.23          | 3.95          | 5.03          | 5.78          | 6.35          |

198  
199  
200  
201  
202  
203  
204  
205  
206  
207  
208  
209  
210  
211  
212  
213  
214  
215  
216  
217  
218  
219  
220  
221  
222  
223  
224  
225  
226  
227  
228  
229  
230  
231  
232  
233  
234  
235  
236  
237  
238  
239  
240  
241  
242  
243  
244

4. Bias correction.

*The bias correction (Section 3.4) subtracts regional mean T/S differences between models and reanalysis. This approach effectively forces the models closer to the reference state and artificially improves agreement. To me, it is not clear that this procedure provides meaningful insight into model skill.*

Response:

Thanks for the reviewer's comments. We agree that correcting regional mean temperature and salinity biases does bring the simulated temperature and salinity states closer to the reference dataset. In this study, bias correction is used only as a diagnostic method to examine whether some models contain systematic mean-state biases and whether, after removing these biases, their AABW spatial distributions can be recovered to some extent. At the same time, some models still perform poorly after correction, indicating that their problems cannot be explained solely by mean temperature and salinity biases.

Figure R4 compares the spatial pattern of potential temperature and salinity at 4000 m and the near-bottom layer in 16 CMIP6 models and the Ensemble Reanalysis relative to WOA23. In the Taylor diagrams, the spatial correlation coefficient (SCC) is used to measure the similarity of the spatial structures between the simulations and the reference dataset, the normalized standard deviation (NSTD) is used to measure the difference in the amplitude of simulated spatial variability relative to the observations, and the normalized centered root-mean-square error (NCRMSE) reflects the spatial pattern error between the two after removing their spatial means. The results show that, although some models cannot identify AABW distributions according to the neutral density and salinity thresholds, their temperature and salinity fields exhibit a certain degree of spatial correlation and relatively reasonable spatial variability. This indicates that these models may retain some spatial structures similar to the observations, and that their poor AABW identification may, to some extent, be affected by systematic mean-state biases. In contrast, some models exhibit low or even negative SCCs, NSTD values that clearly deviate from the reference dataset, and large NCRMSE values, indicating that their problems also involve the temperature and salinity spatial structures themselves.

Based on the differences revealed by the Taylor diagrams, we further compared the AABW identification results before and after bias correction to determine whether the AABW spatial distributions of the models could be recovered after removing the regional mean temperature and salinity biases. Tables R3 and R4 give the area of WPBW, RSBW, and ALBW identified by each model before correction at 4000 m and the near-bottom layer, respectively, together with the mean potential temperature and salinity within the area of each subtype. Tables R5 and R6 provide the corresponding results after bias correction. Therefore, by comparing Table R3 with Table R5 and Table R4 with Table R6, we can determine whether the AABW subtypes in each model can be recovered to some extent after removing the regional mean temperature and salinity biases. For example, before correction, ACCESS-ESM1-5 identifies only  $0.03 \times 10^6$  km<sup>2</sup> of WPBW at 4000 m and does not identify RSBW or ALBW (Table R3). After correction, the identified areas of WPBW, RSBW, and ALBW increase to 6.20, 2.47, and  $2.71 \times 10^6$  km<sup>2</sup>, respectively (Table R5).

245 This indicates that, after removing the mean-state bias, part of the regional spatial structure  
246 simulated by this model can satisfy the AABW classification criteria. In contrast, some models  
247 cannot reasonably identify specific AABW subtypes either before or after correction. For example,  
248 before correction, CNRM-CM6-1-HR does not identify WPBW, RSBW, or ALBW at the near-  
249 bottom layer (Table R4); after the regional mean temperature and salinity bias correction, the  
250 model still does not identify WPBW or RSBW, and the identified ALBW area is only  $0.01 \times 10^6$   
251  $\text{km}^2$  (Table R6).

252

253 In summary, bias correction is not intended to artificially improve the agreement between the  
254 models and the reference dataset, but rather to distinguish models that are primarily affected by  
255 systematic mean-state biases from those that still exhibit clear spatial structural deficiencies after  
256 correction.

257

258

259

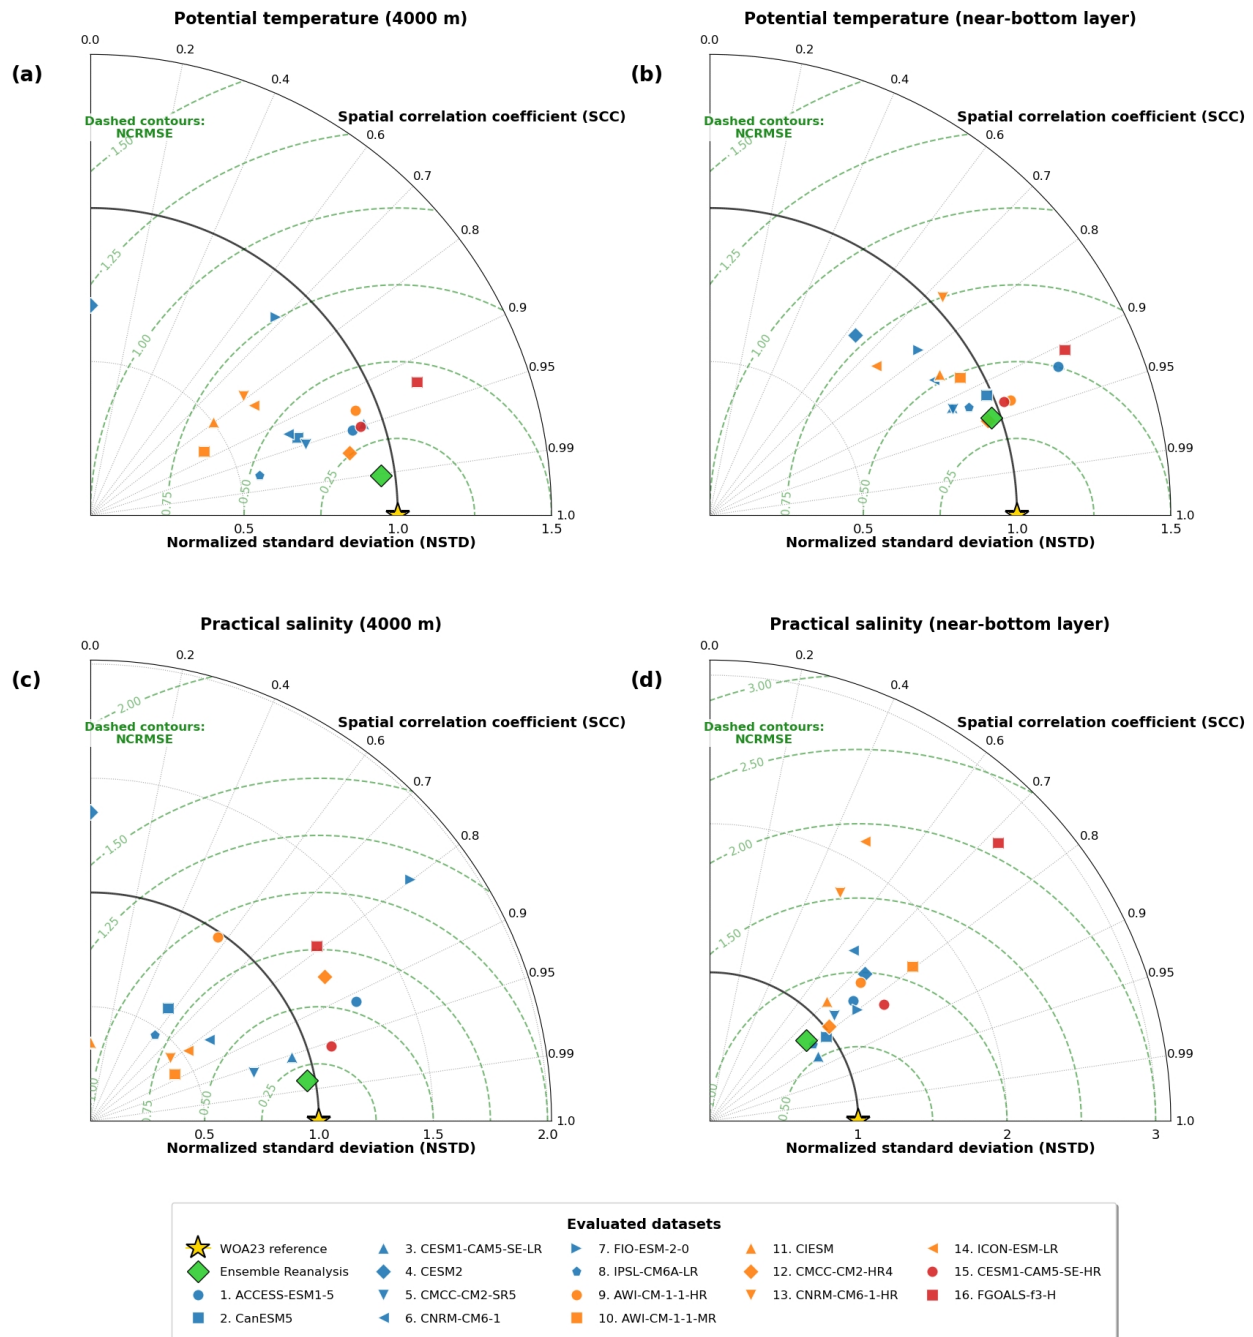

260  
261  
262  
263  
264  
265  
266  
267  
268  
269  
270

Figure R4. Taylor diagrams evaluating the ability of the simulations to reproduce the spatial distributions of thermohaline properties across the Southern Ocean south of 50°S. The upper row shows potential temperature at the 4000 m depth layer (a) and the near-bottom layer (b), while the lower row shows practical salinity at the 4000 m depth layer (c) and the near-bottom layer (d). The thermohaline spatial fields from the Ensemble Reanalysis and 16 CMIP6 models are evaluated against the WOA23 climatological reference. The gold star at SCC = 1 and NSTD = 1 represents the WOA23 reference. In each diagram, the angular coordinate represents the spatial correlation coefficient (SCC), which measures the similarity between the simulated and reference spatial distributions, while the radial coordinate represents the normalized standard deviation (NSTD), which indicates the amplitude of simulated spatial variability relative to WOA23. The green

271 dashed contours represent the normalized centered root-mean-square error (NCRMSE). The  
 272 datasets are distinguished by color: the Ensemble Reanalysis is shown in green, low-resolution  
 273 CMIP6 models in blue, moderate-resolution models in orange, and high-resolution models in red.  
 274 Because the diagrams display only the non-negative-correlation quadrant, models with  $SCC \leq 0$   
 275 are plotted on the zero-correlation boundary. To prevent excessive stretching of the radial scale,  
 276 data points with  $NSTD > 10$  are not displayed.

277  
 278  
 279 Table R3. Quantitative metrics of the simulated Antarctic Bottom Water (AABW) subtypes at the  
 280 4000 m depth layer across the Southern Ocean (south of 50°S). The table details the spatial area  
 281 ( $10^6 \text{ km}^2$ ), mean potential temperature (PT, °C), and mean practical salinity (S) for the Weddell–  
 282 Prydz Bottom Water (WPBW), Ross Sea Bottom Water (RSBW), and Adélie Land Bottom Water  
 283 (ALBW). Metrics are evaluated for the WOA23 climatological reference, the Ensemble Reanalysis,  
 284 and 16 CMIP6 models. AABW subtype properties are averaged strictly within the spatial extent  
 285 where each dataset successfully satisfies the prescribed density and salinity thresholds. A value of  
 286 0 in the area column indicates that no grid cells satisfy the prescribed criteria for the corresponding  
 287 subtype. In such cases, the mean potential temperature and practical salinity cannot be calculated  
 288 and are therefore denoted by dashes.

| Dataset                                   | WPBW<br>Area | WPBW<br>Mean PT | WPBW<br>Mean S | RSBW<br>Area | RSBW<br>Mean PT | RSBW<br>Mean S | ALBW<br>Area | ALBW<br>Mean PT | ALBW<br>Mean S |
|-------------------------------------------|--------------|-----------------|----------------|--------------|-----------------|----------------|--------------|-----------------|----------------|
| [ Observational & Reanalysis References ] |              |                 |                |              |                 |                |              |                 |                |
| WOA23<br>(Reference)                      | 7.56         | -0.55           | 34.657         | 2.92         | 0.04            | 34.701         | 3.10         | -0.21           | 34.677         |
| Ensemble<br>Reanalysis                    | 7.51         | -0.53           | 34.659         | 2.83         | 0.04            | 34.704         | 3.25         | -0.19           | 34.682         |
| [ Low-Resolution CMIP6 Models ]           |              |                 |                |              |                 |                |              |                 |                |
| ACCESS-<br>ESM1-5                         | 0.03         | -0.29           | 34.631         | 0            | -               | -              | 0            | -               | -              |
| CanESM5                                   | 8.26         | -0.96           | 34.652         | 3.19         | -0.49           | 34.689         | 1.40         | -0.72           | 34.664         |
| CESM1-<br>CAM5-SE-LR                      | 6.39         | -0.47           | 34.659         | 2.20         | 0.05            | 34.693         | 2.38         | -0.13           | 34.680         |
| CESM2                                     | 0            | -               | -              | 0            | -               | -              | 0            | -               | -              |
| CMCC-CM2-<br>SR5                          | 3.16         | -0.20           | 34.667         | 0            | -               | -              | 0.01         | 0.04            | 34.676         |
| CNRM-CM6-1                                | 0            | -               | -              | 0            | -               | -              | 0            | -               | -              |
| FIO-ESM-2-0                               | 0            | -               | -              | 0            | -               | -              | 0            | -               | -              |
| IPSL-CM6A-<br>LR                          | 8.30         | -1.14           | 34.657         | 3.53         | -0.85           | 34.683         | 3.42         | -0.90           | 34.672         |
| [ Moderate-Resolution CMIP6 Models ]      |              |                 |                |              |                 |                |              |                 |                |
| AWI-CM-1-1-<br>HR                         | 0            | -               | -              | 2.09         | -0.41           | 34.710         | 1.89         | -0.80           | 34.695         |
| AWI-CM-1-1-<br>MR                         | 0            | -               | -              | 0            | -               | -              | 0            | -               | -              |
| CIESM                                     | 0            | -               | -              | 0            | -               | -              | 0            | -               | -              |
| CMCC-CM2-<br>HR4                          | 0            | -               | -              | 0            | -               | -              | 0            | -               | -              |

|                                  |      |       |        |      |       |        |      |       |        |
|----------------------------------|------|-------|--------|------|-------|--------|------|-------|--------|
| CNRM-CM6-1-HR                    | 0    | -     | -      | 0    | -     | -      | 0    | -     | -      |
| ICON-ESM-LR                      | 0    | -     | -      | 0    | -     | -      | 0    | -     | -      |
| [ High-Resolution CMIP6 Models ] |      |       |        |      |       |        |      |       |        |
| CESM1-CAM5-SE-HR                 | 8.42 | -0.39 | 34.659 | 1.24 | 0.15  | 34.709 | 0.10 | -0.19 | 34.667 |
| FGOALS-f3-H                      | 4.24 | -0.92 | 34.641 | 2.59 | -0.02 | 34.689 | 1.59 | -0.25 | 34.677 |

289  
290  
291  
292  
293  
294

Table R4. Quantitative metrics of the simulated Antarctic Bottom Water (AABW) subtypes at the near-bottom layer. The variables, evaluated datasets, and spatial averaging criteria are identical to those detailed in Table R3. A value of 0 in the area column indicates that no grid cells satisfy the prescribed criteria for the corresponding subtype.

| Dataset                                   | WPBW Area | WPBW Mean PT | WPBW Mean S | RSBW Area | RSBW Mean PT | RSBW Mean S | ALBW Area | ALBW Mean PT | ALBW Mean S |
|-------------------------------------------|-----------|--------------|-------------|-----------|--------------|-------------|-----------|--------------|-------------|
| [ Observational & Reanalysis References ] |           |              |             |           |              |             |           |              |             |
| WOA23 (Reference)                         | 12.19     | -0.62        | 34.654      | 7.27      | -0.04        | 34.700      | 5.59      | -0.26        | 34.678      |
| Ensemble Reanalysis                       | 10.57     | -0.56        | 34.658      | 6.33      | 0.04         | 34.704      | 6.01      | -0.18        | 34.682      |
| [ Low-Resolution CMIP6 Models ]           |           |              |             |           |              |             |           |              |             |
| ACCESS-ESM1-5                             | 0.16      | -0.25        | 34.635      | 0.02      | -1.75        | 34.694      | 0         | -            | -           |
| CanESM5                                   | 14.55     | -0.87        | 34.653      | 8.09      | -0.48        | 34.690      | 2.95      | -0.70        | 34.665      |
| CESM1-CAM5-SE-LR                          | 10.07     | -0.53        | 34.657      | 7.82      | -0.02        | 34.691      | 4.81      | -0.15        | 34.679      |
| CESM2                                     | 0         | -            | -           | 0.05      | -1.93        | 34.697      | 0         | -            | -           |
| CMCC-CM2-SR5                              | 6.75      | -0.28        | 34.665      | 0.08      | -0.81        | 34.692      | 0.72      | 0.01         | 34.678      |
| CNRM-CM6-1                                | 0         | -            | -           | 0         | -            | -           | 0         | -            | -           |
| FIO-ESM-2-0                               | 0.26      | -0.26        | 34.669      | 0.03      | -1.11        | 34.693      | 0         | -            | -           |
| IPSL-CM6A-LR                              | 14.95     | -1.10        | 34.656      | 8.68      | -0.85        | 34.685      | 6.51      | -0.85        | 34.675      |
| [ Moderate-Resolution CMIP6 Models ]      |           |              |             |           |              |             |           |              |             |
| AWI-CM-1-1-HR                             | 0.56      | -1.09        | 34.658      | 3.63      | -0.44        | 34.708      | 3.13      | -0.78        | 34.692      |
| AWI-CM-1-1-MR                             | 0.08      | -1.24        | 34.650      | 0.08      | -0.88        | 34.698      | 0.04      | -0.48        | 34.687      |
| CIESM                                     | 0         | -            | -           | 0         | -            | -           | 0         | -            | -           |
| CMCC-CM2-HR4                              | 0.07      | -1.15        | 34.652      | 0.16      | -0.54        | 34.695      | 0.05      | -0.51        | 34.684      |
| CNRM-CM6-1-HR                             | 0         | -            | -           | 0         | -            | -           | 0         | -            | -           |
| ICON-ESM-LR                               | 0.01      | -0.31        | 34.658      | 0.01      | -0.24        | 34.698      | 0.004     | -0.13        | 34.683      |
| [ High-Resolution CMIP6 Models ]          |           |              |             |           |              |             |           |              |             |

|                  |       |       |        |      |       |        |      |       |        |
|------------------|-------|-------|--------|------|-------|--------|------|-------|--------|
| CESM1-CAM5-SE-HR | 11.61 | -0.41 | 34.657 | 3.20 | 0.14  | 34.709 | 0.44 | -0.15 | 34.668 |
| FGOALS-f3-H      | 5.71  | -0.91 | 34.643 | 4.35 | -0.07 | 34.689 | 3.89 | -0.26 | 34.676 |

295  
296  
297  
298  
299  
300  
301  
302

Table R5. Quantitative metrics of the bias-corrected simulated Antarctic Bottom Water (AABW) subtypes at the 4000 m depth layer. The table details the spatial area ( $10^6$  km<sup>2</sup>), mean potential temperature (PT, °C), and mean practical salinity (S) for the Weddell–Prydz Bottom Water (WPBW), Ross Sea Bottom Water (RSBW), and Adélie Land Bottom Water (ALBW). A value of 0 in the area column indicates that no grid cells satisfy the prescribed criteria for the corresponding subtype despite the mean-state bias correction.

| Dataset                              | WPBW Area | WPBW Mean PT | WPBW Mean S | RSBW Area | RSBW Mean PT | RSBW Mean S | ALBW Area | ALBW Mean PT | ALBW Mean S |
|--------------------------------------|-----------|--------------|-------------|-----------|--------------|-------------|-----------|--------------|-------------|
| [ Low-Resolution CMIP6 Models ]      |           |              |             |           |              |             |           |              |             |
| ACCESS-ESM1-5                        | 6.20      | -0.54        | 34.657      | 2.47      | 0.07         | 34.690      | 2.71      | -0.20        | 34.680      |
| CanESM5                              | 8.17      | -0.48        | 34.661      | 0.34      | 0.21         | 34.705      | 3.11      | -0.18        | 34.685      |
| CESM1-CAM5-SE-LR                     | 6.54      | -0.55        | 34.657      | 2.64      | 0.05         | 34.698      | 2.62      | -0.21        | 34.680      |
| CESM2                                | 6.40      | -0.52        | 34.657      | 1.14      | 0.05         | 34.683      | 1.37      | -0.19        | 34.681      |
| CMCC-CM2-SR5                         | 6.38      | -0.55        | 34.657      | 1.24      | 0.12         | 34.702      | 2.58      | -0.19        | 34.681      |
| CNRM-CM6-1                           | 7.63      | -0.49        | 34.660      | 2.32      | 0.15         | 34.703      | 3.22      | -0.19        | 34.681      |
| FIO-ESM-2-0                          | 2.79      | -0.61        | 34.646      | 2.15      | -0.14        | 34.681      | 1.42      | -0.19        | 34.678      |
| IPSL-CM6A-LR                         | 8.29      | -0.47        | 34.661      | 0.64      | 0.21         | 34.714      | 3.21      | -0.17        | 34.685      |
| [ Moderate-Resolution CMIP6 Models ] |           |              |             |           |              |             |           |              |             |
| AWI-CM-1-1-HR                        | 5.93      | -0.44        | 34.655      | 0.47      | 0.12         | 34.692      | 2.54      | -0.18        | 34.680      |
| AWI-CM-1-1-MR                        | 7.41      | -0.50        | 34.659      | 0.88      | 0.22         | 34.712      | 2.99      | -0.17        | 34.683      |
| CIESM                                | 6.88      | -0.53        | 34.659      | 1.37      | 0.12         | 34.699      | 2.74      | -0.18        | 34.682      |
| CMCC-CM2-HR4                         | 7.03      | -0.51        | 34.659      | 1.40      | 0.07         | 34.694      | 2.72      | -0.17        | 34.684      |
| CNRM-CM6-1-HR                        | 7.65      | -0.49        | 34.660      | 0         | -            | -           | 3.77      | -0.12        | 34.685      |
| ICON-ESM-LR                          | 6.44      | -0.55        | 34.658      | 1.90      | 0            | 34.695      | 2.60      | -0.18        | 34.682      |
| [ High-Resolution CMIP6 Models ]     |           |              |             |           |              |             |           |              |             |
| CESM1-CAM5-SE-HR                     | 8.11      | -0.51        | 34.659      | 1.80      | 0.08         | 34.703      | 3.42      | -0.15        | 34.683      |
| FGOALS-f3-H                          | 5.89      | -0.60        | 34.654      | 1.60      | 0            | 34.683      | 1.72      | -0.18        | 34.680      |

303  
304  
305  
306  
307

Table R6. Quantitative metrics of the bias-corrected simulated Antarctic Bottom Water (AABW) subtypes at the near-bottom layer. The evaluated variables, bias-correction methodology, and spatial averaging criteria are identical to those detailed in Table R5. A value of 0 in the area column

308 indicates that no grid cells satisfy the prescribed criteria for the corresponding subtype despite the  
 309 mean-state bias correction.

| Dataset                              | WPBW Area | WPBW Mean PT | WPBW Mean S | RSBW Area | RSBW Mean PT | RSBW Mean S | ALBW Area | ALBW Mean PT | ALBW Mean S |
|--------------------------------------|-----------|--------------|-------------|-----------|--------------|-------------|-----------|--------------|-------------|
| [ Low-Resolution CMIP6 Models ]      |           |              |             |           |              |             |           |              |             |
| ACCESS-ESM1-5                        | 9.71      | -0.69        | 34.653      | 8.53      | 0            | 34.701      | 5.50      | -0.26        | 34.686      |
| CanESM5                              | 12.55     | -0.51        | 34.661      | 3.53      | 0.16         | 34.703      | 6.35      | -0.17        | 34.692      |
| CESM1-CAM5-SE-LR                     | 10.58     | -0.57        | 34.655      | 5.56      | 0.09         | 34.703      | 5.70      | -0.22        | 34.677      |
| CESM2                                | 4.17      | -0.43        | 34.666      | 5.17      | 0.01         | 34.691      | 1.70      | -0.14        | 34.681      |
| CMCC-CM2-SR5                         | 11.8      | -0.54        | 34.651      | 4.04      | 0.15         | 34.708      | 5.93      | -0.14        | 34.675      |
| CNRM-CM6-1                           | 0         | -            | -           | 0.30      | 0.13         | 34.710      | 5.64      | -0.15        | 34.694      |
| FIO-ESM-2-0                          | 2.79      | -0.45        | 34.648      | 6.51      | -0.10        | 34.692      | 1.77      | -0.10        | 34.679      |
| IPSL-CM6A-LR                         | 13.53     | -0.43        | 34.659      | 3.43      | 0.17         | 34.712      | 5.64      | -0.13        | 34.688      |
| [ Moderate-Resolution CMIP6 Models ] |           |              |             |           |              |             |           |              |             |
| AWI-CM-1-1-HR                        | 9.47      | -0.61        | 34.650      | 2.52      | 0.07         | 34.697      | 3.90      | -0.20        | 34.678      |
| AWI-CM-1-1-MR                        | 9.34      | -0.54        | 34.665      | 0.07      | -0.48        | 34.699      | 6.61      | -0.17        | 34.694      |
| CIESM                                | 7.19      | -0.64        | 34.668      | 4.95      | 0.17         | 34.709      | 5.29      | -0.23        | 34.686      |
| CMCC-CM2-HR4                         | 12.68     | -0.43        | 34.653      | 3.20      | 0.10         | 34.703      | 5.41      | -0.09        | 34.685      |
| CNRM-CM6-1-HR                        | 0         | -            | -           | 0         | -            | -           | 0.01      | 0.19         | 34.702      |
| ICON-ESM-LR                          | 8.39      | -0.63        | 34.664      | 5.71      | 0.03         | 34.710      | 6.49      | -0.14        | 34.688      |
| [ High-Resolution CMIP6 Models ]     |           |              |             |           |              |             |           |              |             |
| CESM1-CAM5-SE-HR                     | 10.01     | -0.52        | 34.66       | 0.14      | -0.24        | 34.706      | 6.27      | -0.03        | 34.689      |
| FGOALS-f3-H                          | 8.69      | -0.88        | 34.654      | 0.03      | -0.54        | 34.699      | 4.06      | -0.29        | 34.677      |

310  
 311  
 312  
 313  
 314  
 315  
 316  
 317  
 318  
 319  
 320  
 321  
 322

Minor Comments

1. Introduction

- L47: repeat transects remain the primary constraint on AABW properties and underpin climatologies such as WOA.

Response:

Thanks for the reviewer’s comment. We have rewritten the relevant descriptions in the Introduction to explicitly emphasize the irreplaceable, foundational role of repeat hydrographic section observations in

323 constraining the physical properties of AABW and in underpinning climatological datasets such as the  
324 WOA.

- 325  
326 • *L86: exhibits*

327  
328 Response:

329 Thanks for the reviewer's comment. We have corrected the spelling error to "exhibits".

- 330  
331 • *L87–90: please provide a reference for the stated claim - it does not obviously follow in my*  
332 *opinion.*

333  
334 Response:

335  
336 Thanks for the reviewer's comments. We agree that the original statement was too broad and  
337 insufficiently supported. We have therefore revised it and cited Purkey and Johnson (2010),  
338 Gunn et al. (2023), Marinov et al. (2006) and Zhang et al. (2023). The revised text reads:

339  
340 “A source-region perspective on AABW is relevant because abyssal warming varies spatially  
341 across ocean basins (Purkey and Johnson, 2010), while bottom-water transport and ventilation  
342 can undergo substantial regional changes (Gunn et al., 2023). In addition, regional Southern  
343 Ocean circulation influences air–sea CO<sub>2</sub> exchange (Marinov et al., 2006), and dense-shelf-  
344 water export transports anthropogenic carbon from the Antarctic shelf into the deep ocean  
345 (Zhang et al., 2023).”

346  
347 References:

348 Gunn, K. L., Rintoul, S. R., England, M. H., and Bowen, M. M.: Recent reduced abyssal  
349 overturning and ventilation in the Australian Antarctic Basin, *Nat. Clim. Change*, 13, 537–544,  
350 <https://doi.org/10.1038/s41558-023-01667-8>, 2023.

351  
352 Marinov, I., Gnanadesikan, A., Toggweiler, J. R., and Sarmiento, J. L.: The Southern Ocean  
353 biogeochemical divide, *Nature*, 441, 964–967, <https://doi.org/10.1038/nature04883>, 2006.

354  
355 Purkey, S. G. and Johnson, G. C.: Warming of global abyssal and deep Southern Ocean waters  
356 between the 1990s and 2000s: Contributions to global heat and sea level rise budgets, *J. Clim.*,  
357 23, 6336–6351, <https://doi.org/10.1175/2010JCLI3682.1>, 2010.

358  
359 Zhang, S., Wu, Y., Cai, W.-J., Cai, W., Feely, R. A., Wang, Z., Tanhua, T., Wang, Y., Liu, C.,  
360 Li, X., Yang, Q., Ding, M., Xu, Z., Kerr, R., Luo, Y., Cheng, X., Chen, L., and Qi, D.: Transport  
361 of anthropogenic carbon from the Antarctic shelf to the deep Southern Ocean triggers  
362 acidification, *Global Biogeochem. Cy.*, 37, e2023GB007921,  
363 <https://doi.org/10.1029/2023GB007921>, 2023.

364  
365  
366  
367 *2. Methods*

- 368 • *L155: Pardo et al. (2012) is based on OMP analysis. Are the quoted values intended as*  
369 *endmembers? This should be clarified explicitly.*

370  
371  
372  
373  
374  
375  
376  
377  
378  
379  
380  
381  
382  
383  
384  
385  
386  
387  
388  
389  
390  
391  
392  
393  
394  
395  
396  
397  
398  
399  
400  
401  
402  
403  
404  
405  
406  
407  
408  
409  
410  
411  
412  
413  
414  
415

Response:

Thanks for the reviewer’s comment. We agree that the values reported by Pardo et al. (2012) represent source-water endmembers derived from an Optimum Multiparameter analysis rather than mean properties of fully mixed AABW. As explained in our response to major comment #2, we now use these salinity values only as central hydrographic reference values, rather than as unmixed endmembers for calculating source-water fractions. The classification is additionally constrained by  $\gamma_n \geq 28.27 \text{ kg m}^{-3}$  and geographical sectors. The sensitivity analysis in Figure R2 and Table R1 further shows that the principal subtype distributions remain broadly stable when the salinity range reaches  $\Delta S = \pm 0.02$ . We have clarified this interpretation and its limitation in the revised Methods section.

- *L163: please justify the exclusion of temperature more clearly.*

Response:

Thanks for the reviewer’s comment. We agree that our previous statement that potential temperature was “excluded” was insufficiently precise. As explained in our response to major comment #3, temperature is incorporated into the neutral-density criterion used to identify AABW. We have therefore removed the phrase “excluding temperature.” We also conducted an additional potential-temperature sensitivity analysis (Figure R3 and Table R2), which shows that a fixed potential-temperature range provides a less stable standalone constraint than the adopted salinity criterion. Potential temperature is therefore retained as an important diagnostic variable for evaluating thermodynamic properties after the subtype distributions have been identified.

- *L174–176: the analysis appears to focus only on two depth levels (4000 m and near-bottom). Please justify this choice and discuss its limitations. Is it possible that the properties of AABW remain similar, but the models just form less? This distinction is needed and is entirely missed by focusing on 2 discrete depth levels.*

Response:

Thank you for this important comment. We agree that the original analysis based only on the 4000 m and near-bottom layers provided relatively limited information on the vertical extent of the AABW subtypes. We have now added salinity diagnostics at two additional depth levels, 3500 m and 4500 m, as shown in Figures R5 and R6, respectively.

The new results show that WOA23 and the Ensemble Reanalysis retain spatially coherent WPBW, RSBW, and ALBW characteristics at both 3500 m and 4500 m. Different CMIP6 models, however, exhibit clearly different levels of vertical persistence. For example, CESM1-CAM5-SE-LR and CanESM5 identify relatively extensive AABW subtype distributions at both 3500 m and 4500 m, indicating that the bottom-water characteristics simulated by these models maintain relatively good vertical continuity between the two depth levels, although their specific spatial extents still differ from those in WOA23.

In contrast, CMCC-CM2-SR5 and FGOALS-f3-H identify some AABW subtype distributions at 4500 m, but the corresponding spatial extents shrink markedly or largely disappear at 3500

416 m. This rapid contraction toward shallower depths is consistent with limited vertical extension  
417 or a smaller overall volume of bottom water.

418  
419 On the other hand, ACCESS-ESM1-5, CESM2, CNRM-CM6-1, CIESM, AWI-CM-1-1-MR,  
420 CMCC-CM2-HR4, and ICON-ESM-LR identify only very small areas of AABW subtypes at  
421 both 3500 m and 4500 m, or no grid cells at all that satisfy the identification criteria adopted in  
422 this study. Therefore, the biases in these models cannot be explained solely by insufficient  
423 AABW vertical thickness or reduced formation volume, but may also involve biases in the  
424 simulated deep-ocean thermohaline structure or regional spatial distribution.  
425

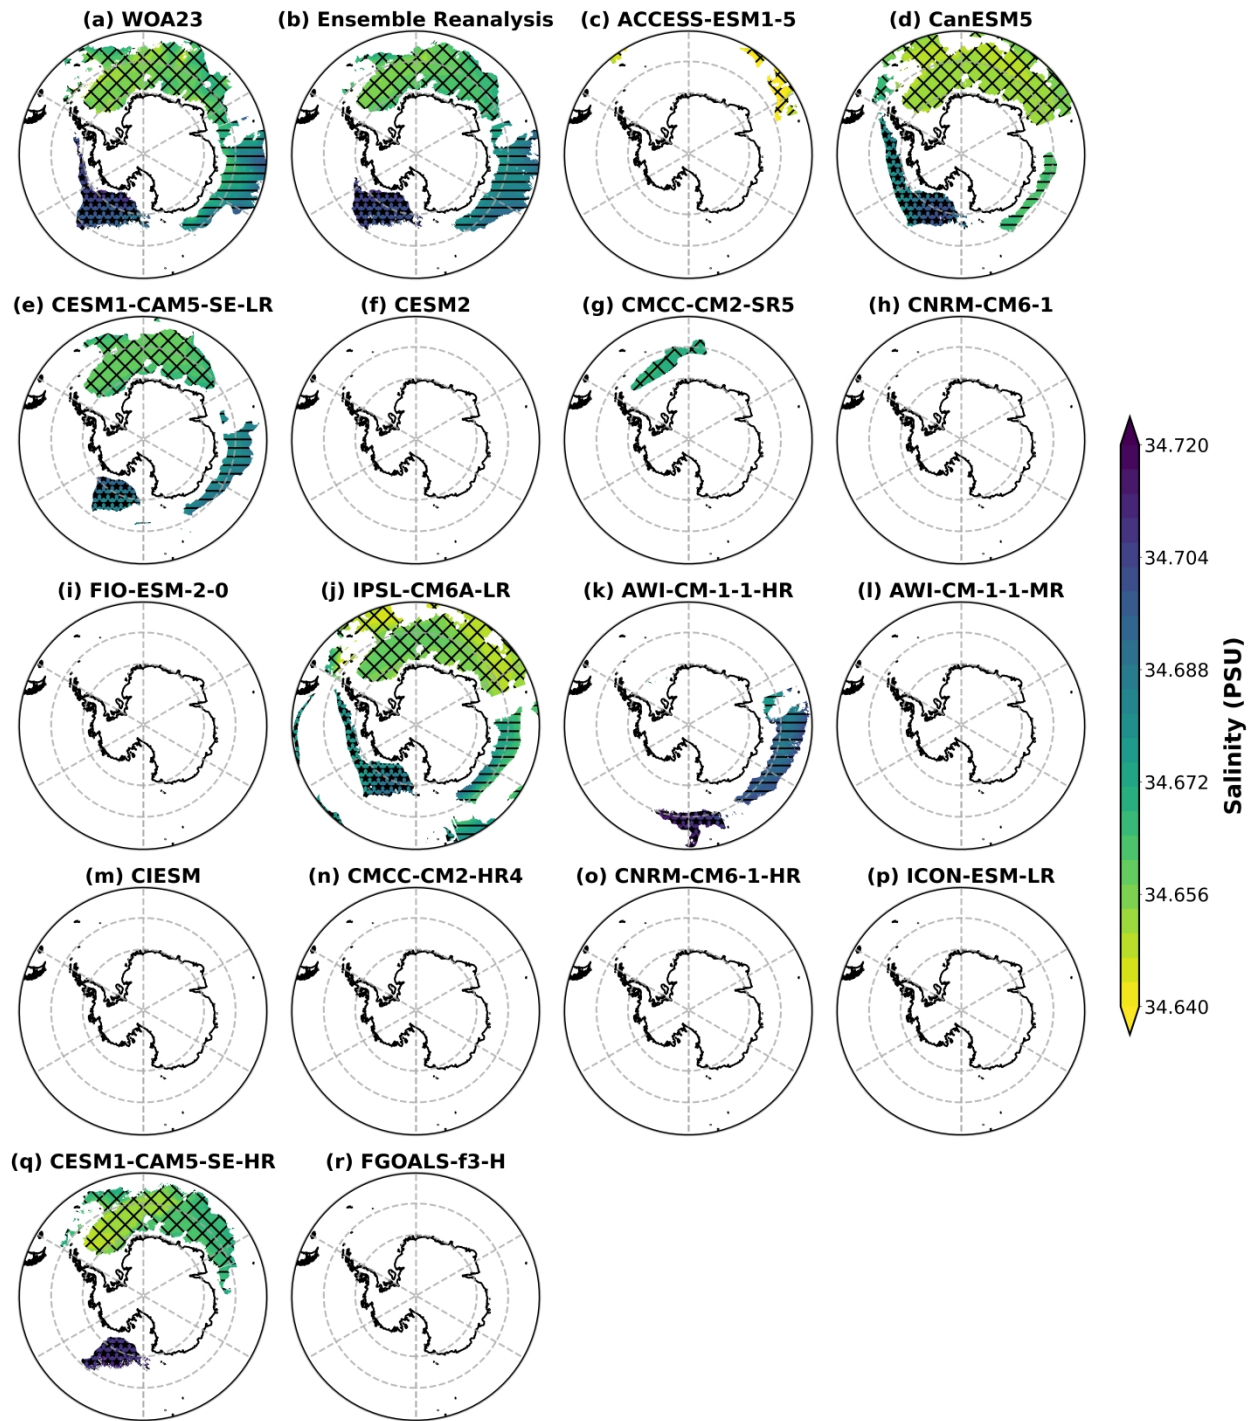

426  
 427  
 428  
 429  
 430  
 431  
 432  
 433

Figure R5. Spatial distributions of practical salinity and the identified Antarctic Bottom Water (AABW) subtypes at the 3500 m depth layer in the Southern Ocean (south of 50°S). The figure displays the WOA23 observational reference, the Ensemble Reanalysis, and 16 CMIP6 models, arranged within a 5 × 4 layout, with 18 populated panels labeled from (a) to (r). The respective AABW subtypes are distinguished by distinct hatching patterns, as detailed in the figure legend.

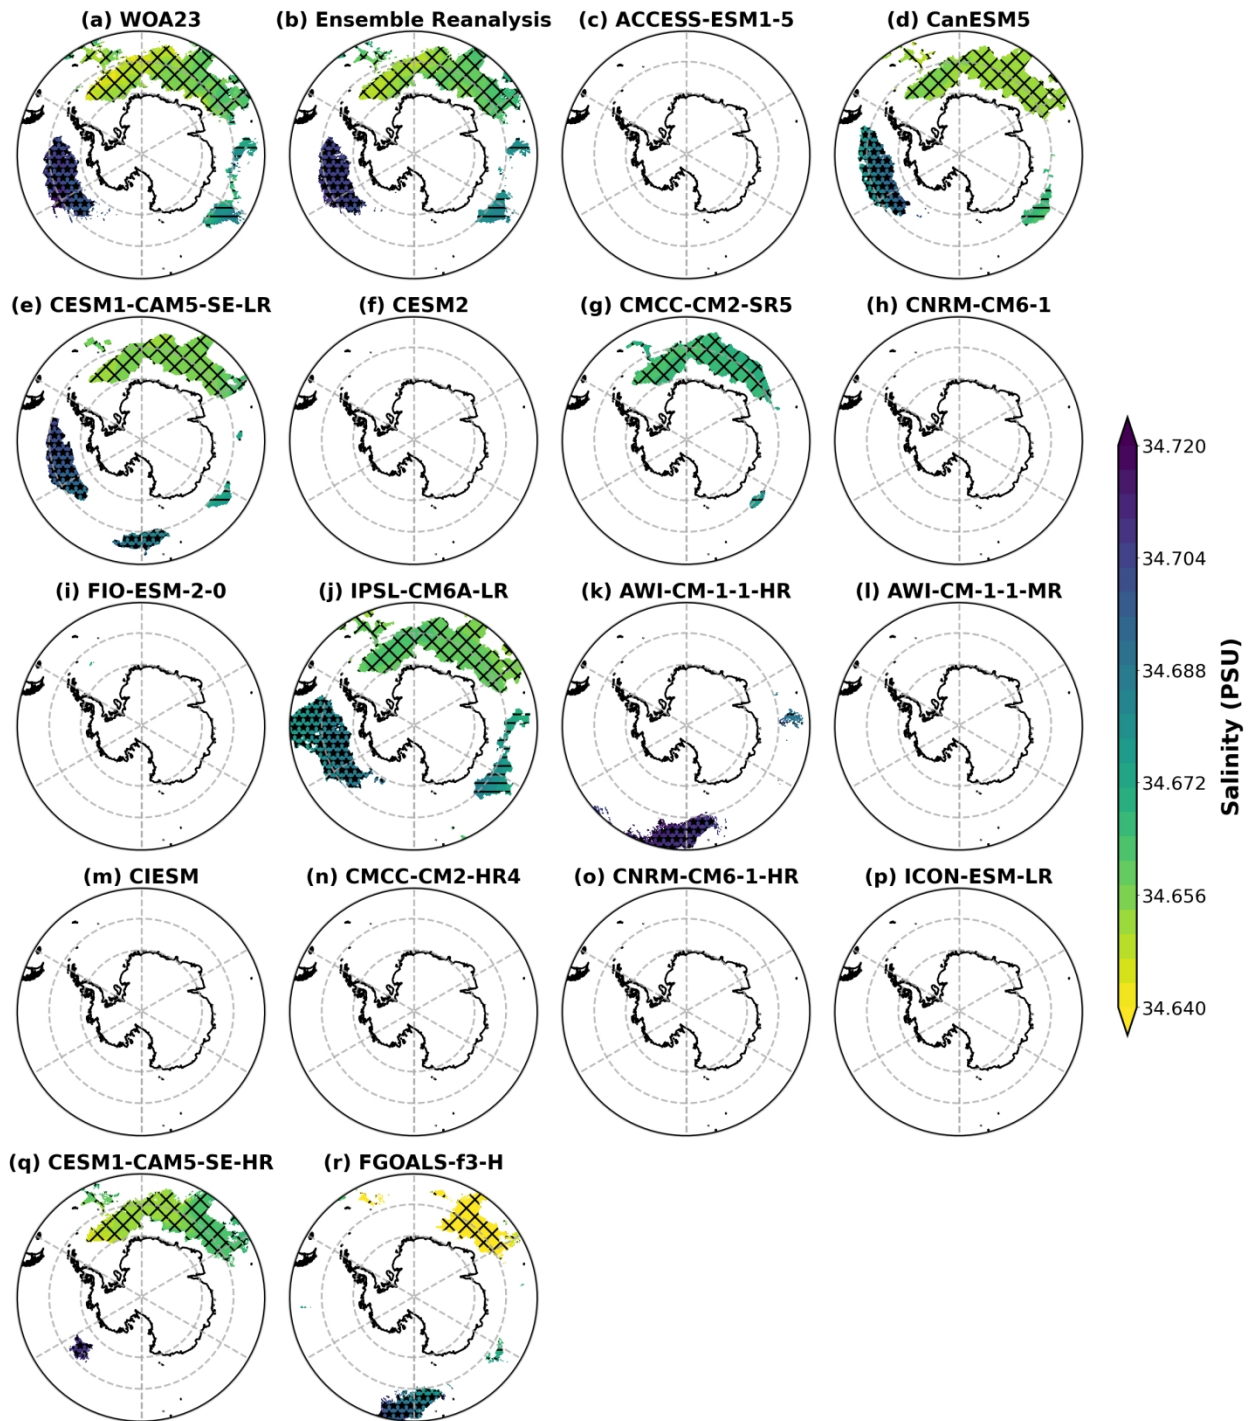

Figure R6. Same as Figure R5, but for the 4500 m depth layer.

434  
435  
436  
437  
438  
439  
440  
441  
442

### 3. Results

- L211: capitalisation issue.

Response:

443 Thanks for the reviewer's comment. We have corrected the capitalization error.

444

445 • *Figures 1–2 and throughout: there is extensive discussion of potential temperature despite it*  
446 *not being part of the classification.*

447

448 Response:

449 Thanks for the reviewer's comment. Potential temperature is not used as an additional independent  
450 threshold for distinguishing the three AABW subtypes. However, temperature is incorporated into the  
451 neutral-density criterion ( $\gamma_n \geq 28.27 \text{ kg m}^{-3}$ ) used to identify AABW.

452

453 After the subtype distributions are identified using neutral density, salinity characteristics, and  
454 geographical sectors, potential temperature is examined as a diagnostic property within those identified  
455 regions. The purpose of Figures 1–2 and the Results section is to describe the thermohaline  
456 characteristics of the identified water masses and to evaluate temperature biases in the Ensemble  
457 Reanalysis and CMIP6 models, rather than to determine subtype membership.

458

459 • *L239–241: The relevance of this discussion to AABW formation is unclear.*

460

461 Response:

462 Thanks for the reviewer's comment. We agree that the original discussion did not clearly explain  
463 the relationship of mesoscale eddies and model resolution to AABW formation.

464

465 We have revised the paragraph to clarify the important roles of mesoscale eddies in cross-shelf  
466 exchanges of heat and salt, the transport and mixing of dense shelf water, and its subsequent  
467 export and spreading into the deep ocean. Therefore, the extent to which mesoscale eddies are  
468 resolved may affect the simulated thermohaline properties and spatial distribution of AABW.

469

470 In addition, AABW formation and export are jointly controlled by other physical processes and  
471 their associated parameterizations. We therefore classify the CMIP6 models into low-, moderate-  
472 , and high-resolution groups to compare their representation of the thermohaline properties and  
473 spatial distribution of AABW, rather than to assume in advance that higher-resolution models  
474 necessarily have better simulation skill.

475

476 • *Figures 3–6: These figures are difficult to read due to small size and dense layout. Consider*  
477 *enlarging panels or splitting figures.*

478

479 Response:

480 Thank you for this suggestion. We agree that the original figures were difficult to read because  
481 too many model panels were presented in a dense layout. We have therefore reorganized the  
482 results and added new Figures R7 and R8, which present the original and bias-corrected  
483 simulations, respectively, using an enlarged  $5 \times 4$  matrix layout. These figures focus on five  
484 representative CMIP6 models spanning different resolutions and levels of performance, allowing  
485 the spatial distributions and thermohaline properties of the AABW subtypes to be examined more  
486 clearly. The quantitative results for all models are retained in the Taylor diagrams and summary  
487 tables.

488

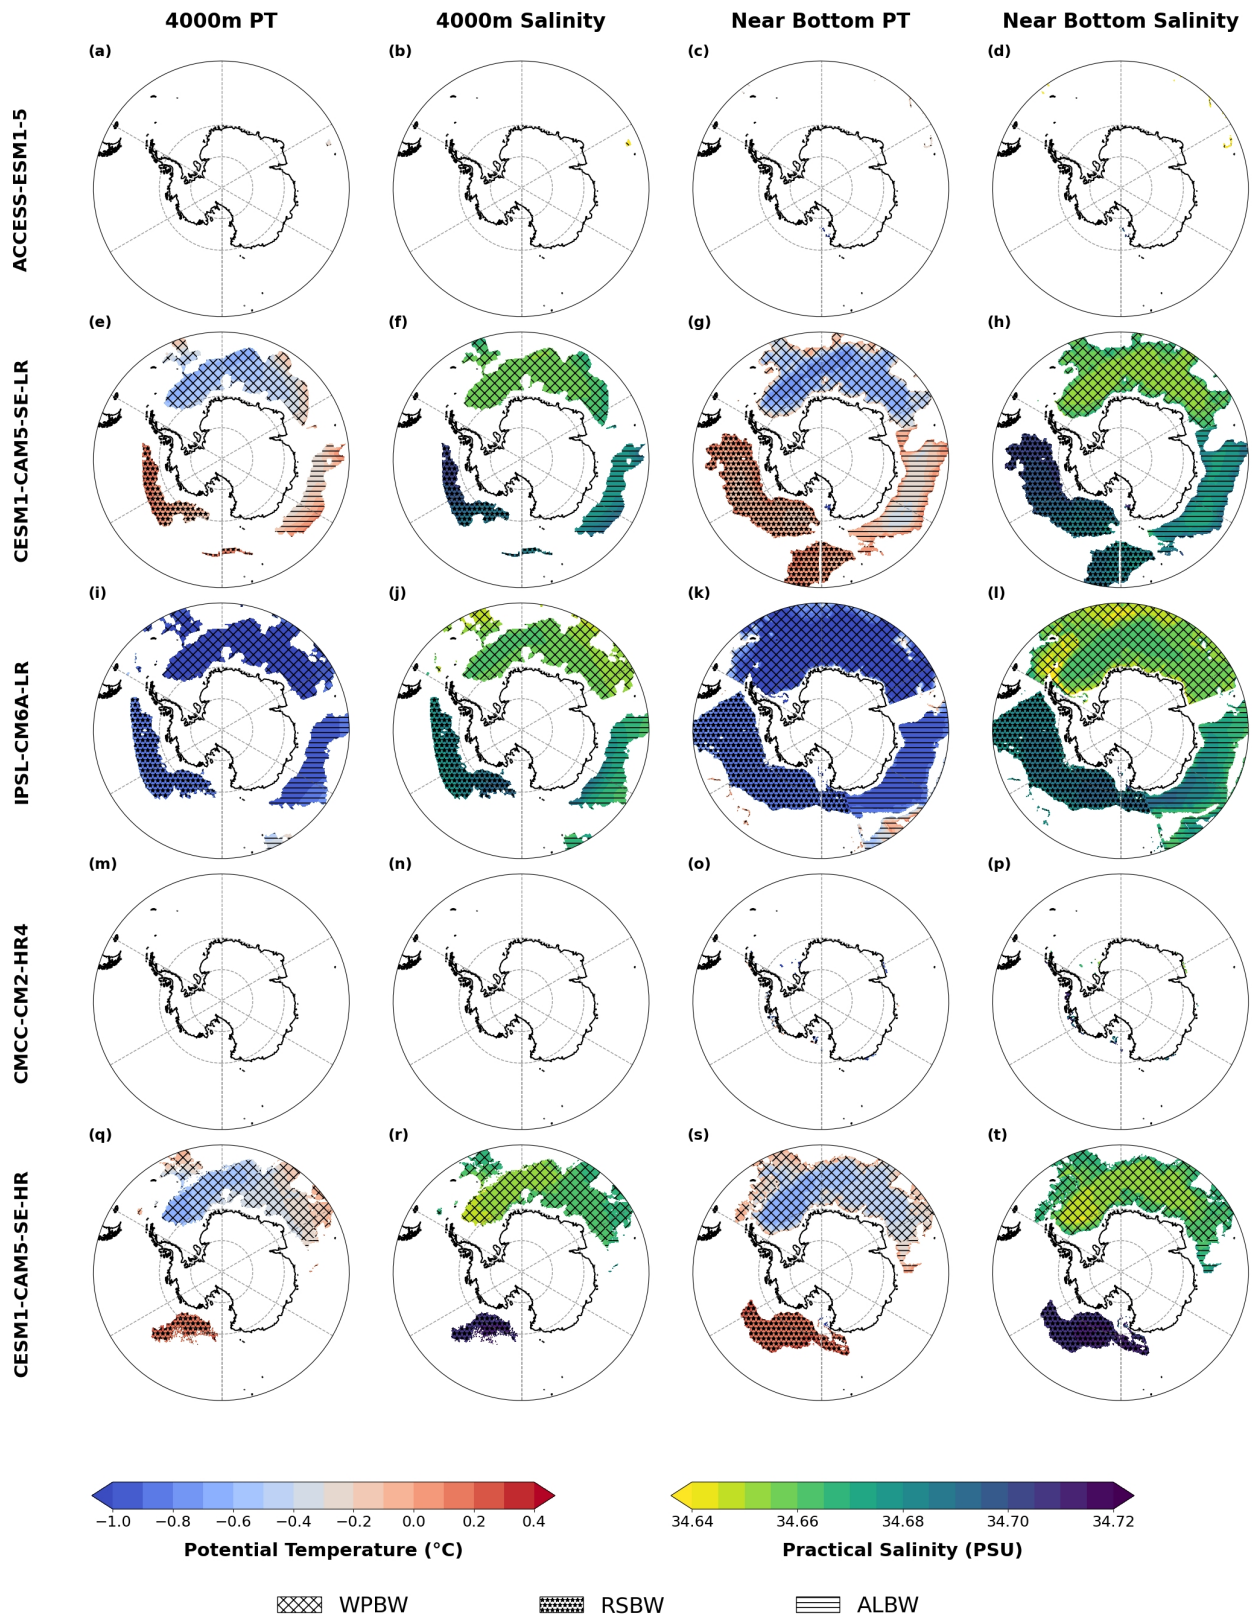

489  
490  
491

Figure R7. Spatial distributions of the native (uncorrected) simulated potential temperature and practical salinity for Antarctic Bottom Water (AABW) subtypes across five representative CMIP6

492 models in the Southern Ocean (south of 50°S). The figure is organized into a  $5 \times 4$  matrix. The  
493 rows represent the strategically selected models: ACCESS-ESM1-5, CESM1-CAM5-SE-LR,  
494 IPSL-CM6A-LR, CMCC-CM2-HR4, and CESM1-CAM5-SE-HR. The columns display the  
495 evaluated thermohaline properties: potential temperature at 4000 m, practical salinity at 4000 m,  
496 potential temperature at the near-bottom layer, and practical salinity at the near-bottom layer.  
497 Subpanels are labeled from (a) to (t). The respective AABW subtypes are distinguished by distinct  
498 hatching patterns, as detailed in the figure legend.

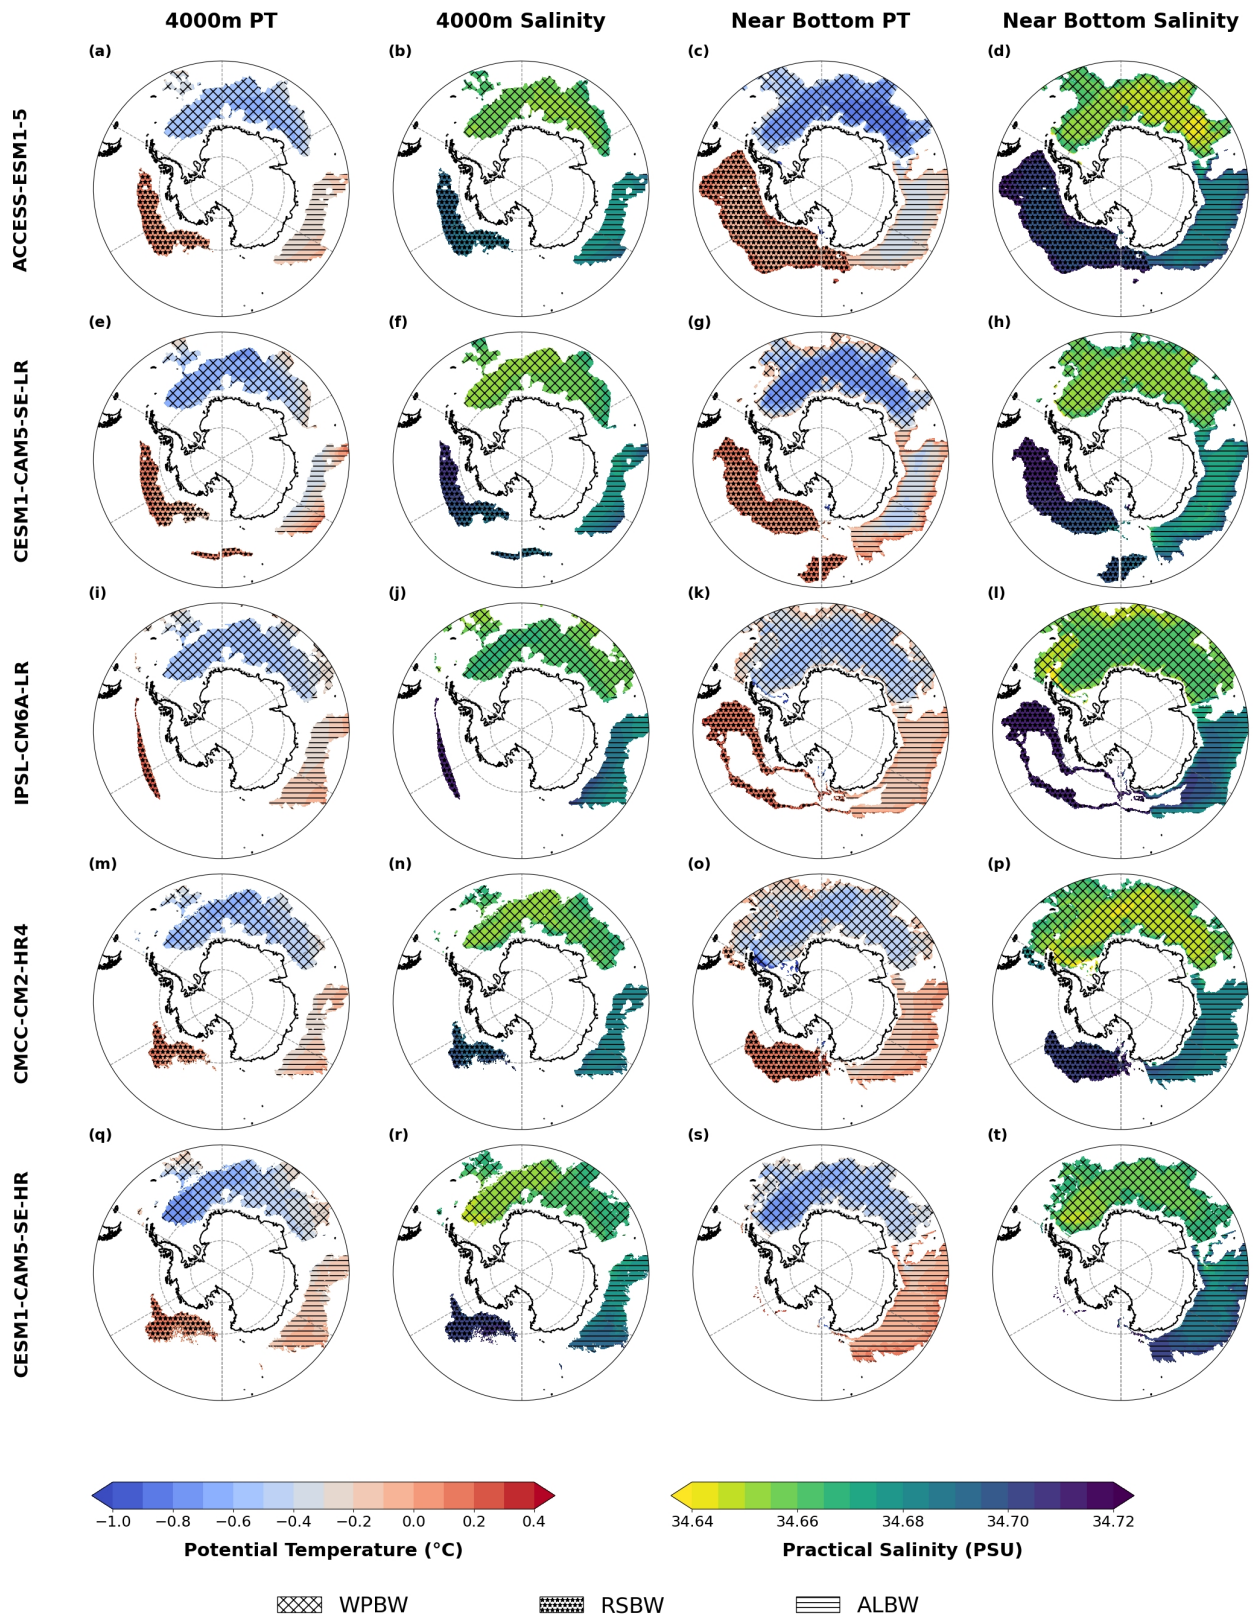

499  
500  
501

Figure R8. Spatial distributions of the bias-corrected potential temperature and practical salinity for AABW subtypes across the same five representative CMIP6 models shown in Figure R7. The

502 matrix layout, including the models in the rows and the thermohaline properties and depth levels  
503 in the columns, is identical to Figure R7. Subpanels are labeled from (a) to (t). The respective  
504 AABW subtypes are represented by distinct hatching patterns, as detailed in the figure legend.

- 505 • *please quantify how well or otherwise each product describes AABW relative to the baseline*

506  
507  
508 Response:

509 Thank you for this important suggestion. We agree that relying solely on visual inspection of  
510 spatial distribution maps makes it difficult to objectively assess how well different data products  
511 represent AABW. Therefore, in the revised manuscript, we have added quantitative evaluations  
512 of the Ensemble Reanalysis and all 16 CMIP6 models, using WOA23 consistently as the  
513 reference baseline.

514  
515 First, the Taylor diagrams in Figure R4 use the spatial correlation coefficient (SCC), normalized  
516 standard deviation (NSTD), and normalized centered root-mean-square error (NCRMSE) to  
517 quantitatively evaluate the simulated spatial patterns of potential temperature and salinity at the  
518 4000 m and near-bottom layers. The SCC measures the agreement between the simulated spatial  
519 pattern and that of WOA23; the NSTD indicates whether the magnitude of simulated spatial  
520 variability is weaker or stronger than that in WOA23; and the NCRMSE provides an integrated  
521 measure of the difference between the simulated and WOA23 spatial structures after removal of  
522 the regional mean.

523  
524 The results show that the Ensemble Reanalysis reproduces the large-scale abyssal thermohaline  
525 structure in WOA23 reasonably well. For example, its SCC for salinity at 4000 m is  
526 approximately 0.98, indicating strong agreement with the regional salinity contrasts and major  
527 spatial gradients in WOA23. In contrast, several CMIP6 models exhibit pronounced structural  
528 biases. CESM2 and CIESM yield SCC values of approximately  $-0.55$  and  $-0.10$ , respectively,  
529 for salinity at 4000 m. The negative correlation for CESM2 indicates that its simulated salinity  
530 anomalies are spatially opposed to those in WOA23 over a substantial part of the domain; that is,  
531 regions that are relatively saline in WOA23 may be represented as relatively fresh in the model,  
532 and vice versa. The SCC of CIESM is slightly below zero, indicating almost no correspondence  
533 between its simulated salinity pattern and that of WOA23.

534  
535 Second, Tables R3 and R4 quantitatively summarize the identified areas and mean potential  
536 temperature and salinity of WPBW, RSBW, and ALBW before bias correction at the 4000 m and  
537 near-bottom layers, respectively, while Tables R5 and R6 present the corresponding results after  
538 bias correction. These statistics allow us to determine whether each product identifies the  
539 respective AABW subtypes and to quantify differences in their simulated spatial extent and  
540 thermohaline properties relative to WOA23.

541  
542 At the 4000 m layer, for example, WOA23 identifies WPBW, RSBW, and ALBW areas of 7.56,  
543 2.92, and  $3.10 \times 10^6$  km<sup>2</sup>, respectively, whereas the corresponding areas identified by the  
544 Ensemble Reanalysis are 7.51, 2.83, and  $3.25 \times 10^6$  km<sup>2</sup>. These values differ from WOA23 by  
545 approximately  $-0.7\%$ ,  $-3.1\%$ , and  $+4.8\%$ , respectively. This indicates that the Ensemble  
546 Reanalysis not only identifies all three AABW subtypes, but also reproduces their spatial extents  
547 reasonably closely.

548 Substantial differences are evident among the CMIP6 models. CESM1-CAM5-SE-LR identifies  
549 all three subtypes at 4000 m, but its WPBW, RSBW, and ALBW areas are 6.39, 2.20, and 2.38  
550  $\times 10^6$  km<sup>2</sup>, respectively, all smaller than those in WOA23. CanESM5 identifies WPBW and  
551 RSBW areas of 8.26 and 3.19  $\times 10^6$  km<sup>2</sup>, respectively, both larger than the WOA23 values,  
552 whereas its identified ALBW area is only 1.40  $\times 10^6$  km<sup>2</sup>. ACCESS-ESM1-5 identifies only  
553 approximately 0.03  $\times 10^6$  km<sup>2</sup> of WPBW at 4000 m and does not identify RSBW or ALBW.  
554 CESM2, CNRM-CM6-1, and CIESM identify none of the three AABW subtypes satisfying the  
555 prescribed criteria at this depth.

556  
557 These additional analyses allow us to quantitatively compare the ability of each data product to  
558 represent the spatial patterns, subtype extents, and thermohaline properties of AABW relative to  
559 WOA23.

560  
561  
562 • *some references appear in inconsistent fonts throughout.*

563  
564 Response:  
565 Thanks for the reviewer's comments. We have carefully checked the entire manuscript and  
566 standardized the font, font size, and formatting of all in-text citations and entries in the reference  
567 list.

568  
569
